# Supplementary material for: Developing a New Parameterization Scheme of Temperature Lapse Rate for the Hydrological Simulation in a Glacierized Basin Based on Remote Sensing
Source: MDPI journal article supplement (doi:10.3390/rs14194973), 2022-10-06
Supplement: s1 [file s1]

Archive with 1 entries (1 files):
- remotesensing-1882700-supplementary.pdf
